# Supplementary material
Source: publisher site journal article supplement (https://www.dovepress.com/article/378340)
Supplement: Supplementary file 1 [file get_supplementary_file.php]

**Section I: Consent form**

Thank you for taking the time to meet with me today. My name is _______________________. I would like to talk to you about your experiences in inventory management practice and the associated challenges of maternal, newborn, and child life-saving drugs in public hospitals. We are assessing inventory management practice and associated challenges to capture lessons that can be used in future interventions. The interview lasts between 25-30 minutes. Please be sure to speak up so that we do not miss your comments. I will keep all responses confidential. This means that I will only share your interview responses with research team members and we ensure that any information we include in our report does not identify you as the respondent. Remember, you do not have to talk about anything you do not want to and you may end the interview. Are there questions about what I have just explained? Are you willing to participate in this interview? Can I continue? Yes ___/ No ___; If no, Stop!

Thank you very much!

Interviewee_____________________Witness___________________ Date__________________Place____________________age_________sex_______current position_____________

Years of experience (total___________ / current position_________________________)

remarks_______________________________________________________________________

**Section II: interview questions and probes**

1. Do you think inventory management practice of maternal, newborn, and child life-saving drug is important? Yes__ /No__, if yes, would you give how? Why?
2. Could you tell me about the challenges to keep inventories under acceptable conditions? Could you explain each?
3. Does the inventory management practice of maternal, newborn, and child health drugs supported with sufficient resources? Can you elaborate more, please?
4. What are the issues to improve inventory management practice of maternal, newborn, and child life-saving drugs? Could you tell me more?
5. What are the common issues regarding inventory management practice of maternal, newborn, and child life-saving drugs? Can you elaborate on that idea?
6. Please describe your facility's commitment to building the practical skill, knowledge, and attitude of the staff. Would you tell me possible disagreements?
7. What type of support do you have from higher-level healthcare facilities? Can you elaborate on it, please? Is there anything more you would like to add?

**Thank you for your time!**
